# Supplementary material for: Optimized high-throughput microRNA expression profiling provides novel biomarker assessment of clinical prostate and breast cancer biopsies.
Source: Springer Nature journal article supplement (doi:10.1186/1476-4598-5-24), 2006-01-01

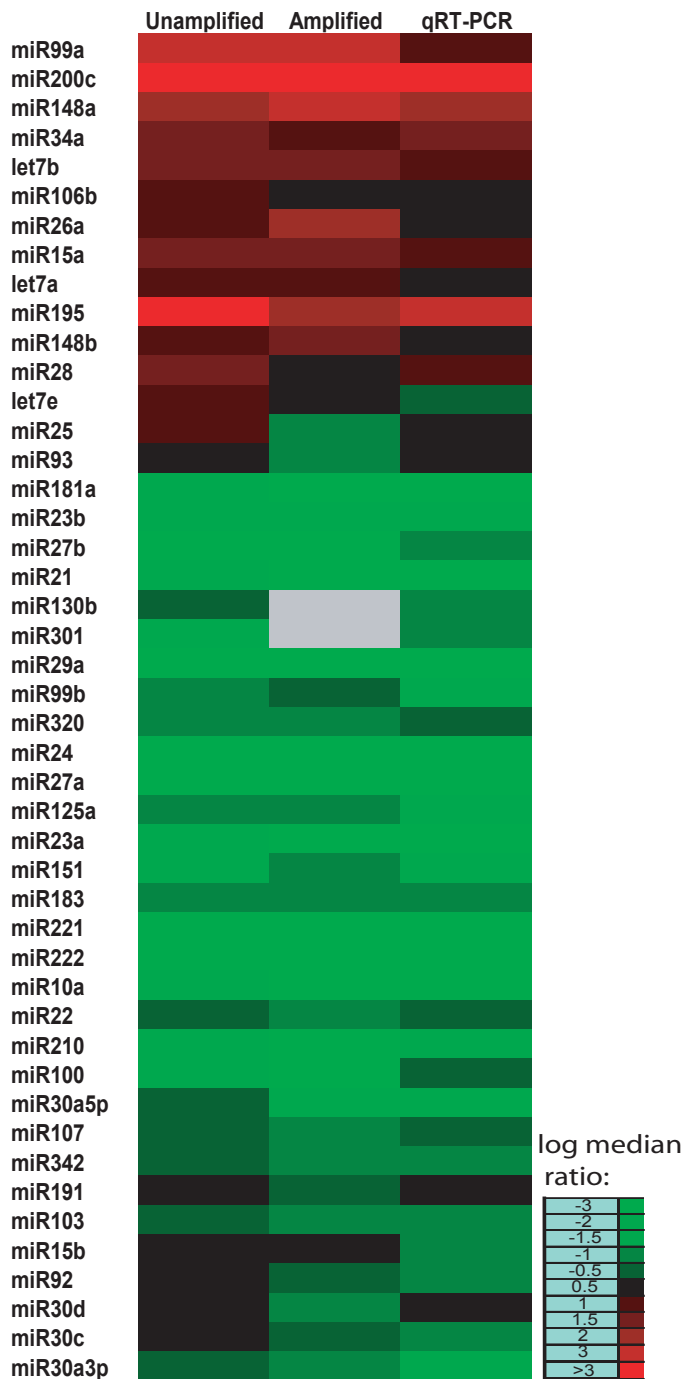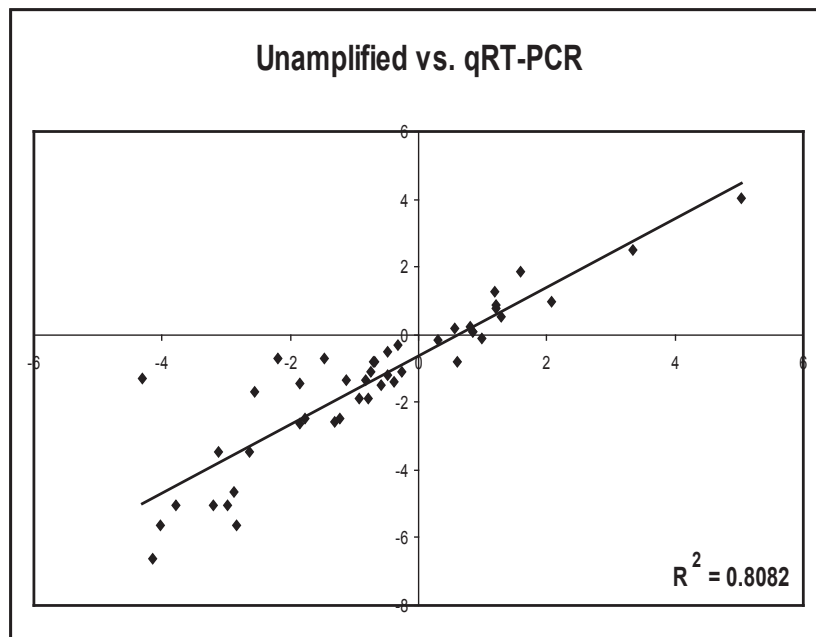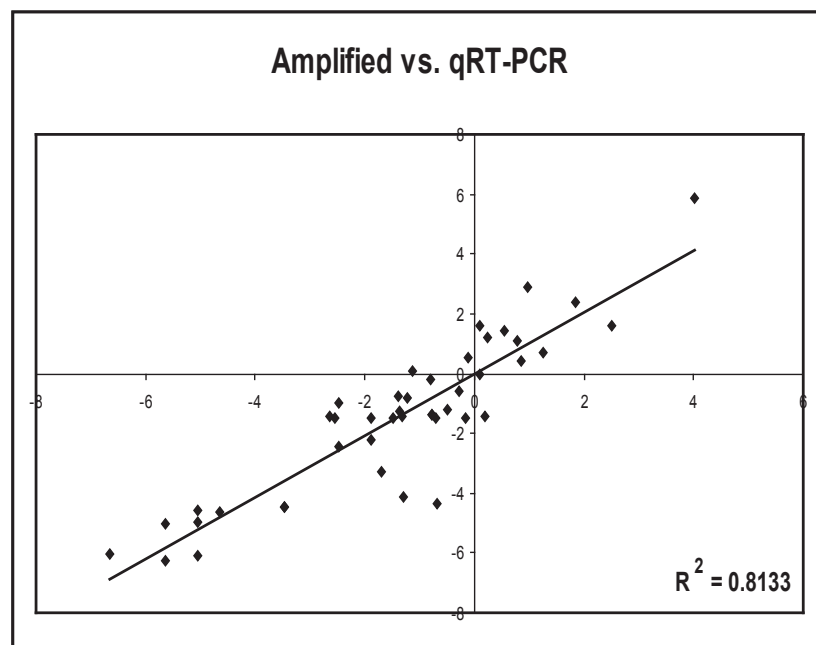

Supplement: 12943_2006_156_MOESM11_ESM.pdf [file 12943_2006_156_MOESM11_ESM.pdf]
