# Supplementary material for: Optimized high-throughput microRNA expression profiling provides novel biomarker assessment of clinical prostate and breast cancer biopsies.
Source: Springer Nature journal article supplement (doi:10.1186/1476-4598-5-24), 2006-01-01
Supplement: 12943_2006_156_MOESM12_ESM.pdf [file 12943_2006_156_MOESM12_ESM.pdf]

5' \_\_\_\_\_ 3' microRNA

1. Poly (A) Tailing of microRNA

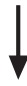

5' \_\_\_\_\_ AAAAAAAAAAAAAAAAAAAAAA 3'

Poly (A) tailed microRNA

2. Hybridization of Reverse Transcription Oligo dT primer

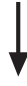

5' \_\_\_\_\_ AAAAAAAAAAAAAAAAAAAAAA 3'  
TTTTTTTTTTTTTTTTTTTTTT 5'

3. Reverse Transcription of Tailed microRNA

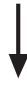

5' \_\_\_\_\_ AAAAAAAAAAAAAAAAAAAAAA 3'  
←----- TTTTTTTTTTTTTTTTTTTTTT 5'

4. Degradation of RNA and purification of cDNA copy of miRNA

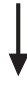

3' \_\_\_\_\_ TTTTTTTTTTTTTTTTTTTTTT 5'

5. Poly (dT) Tailing of cDNA copy of the microRNA

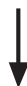

3' TTTTTTTTTTTTTTTTTTTTTT \_\_\_\_\_ TTTTTTTTTTTTTTTTTTTTTT 5'

6. Addition of T7 Promoter synthesis reagents

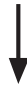

Blocked Extension  
3' ←----- TTTTTTTTTTTTTTTTTTTTTT \_\_\_\_\_ TTTTTTTTTTTTTTTTTTTTTT 5'  
AAAAAAAAAAAAA .....X----->

7. T7 Promoter Synthesis via template directed extension of the 3' end of the cDNA copy of the miRNA

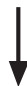

5' ----->  
3' T7 Promoter AAAAAAAAAAAAAA TTTTTTTTTTTTTTTTTTTTTT \_\_\_\_\_ TTTTTTTTTTTTTTTTTTTTTT 5'

8. Purification of amplified 5'/3' poly dA miRNA

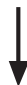

5' = AAAAAAAAAAAAAAAAAAAAAA \_\_\_\_\_ AAAAAAAAAAAAAAAAAAAAAA 3'  
microRNA
